# Supplementary material for: Calcium Uptake and Proton Transport by Acidocalcisomes of Toxoplasma gondii
Source: PLOS journal article supplement (doi:10.1371/journal.pone.0018390), 2011-04-25
Supplement: S1 (10.1371/journal.pone.0018390.s001) [file journal.pone.0018390.s001]

**Calcium uptake and proton transport by acidocalcisomes of  
*Toxoplasma gondii*.**

Rohloff et al.

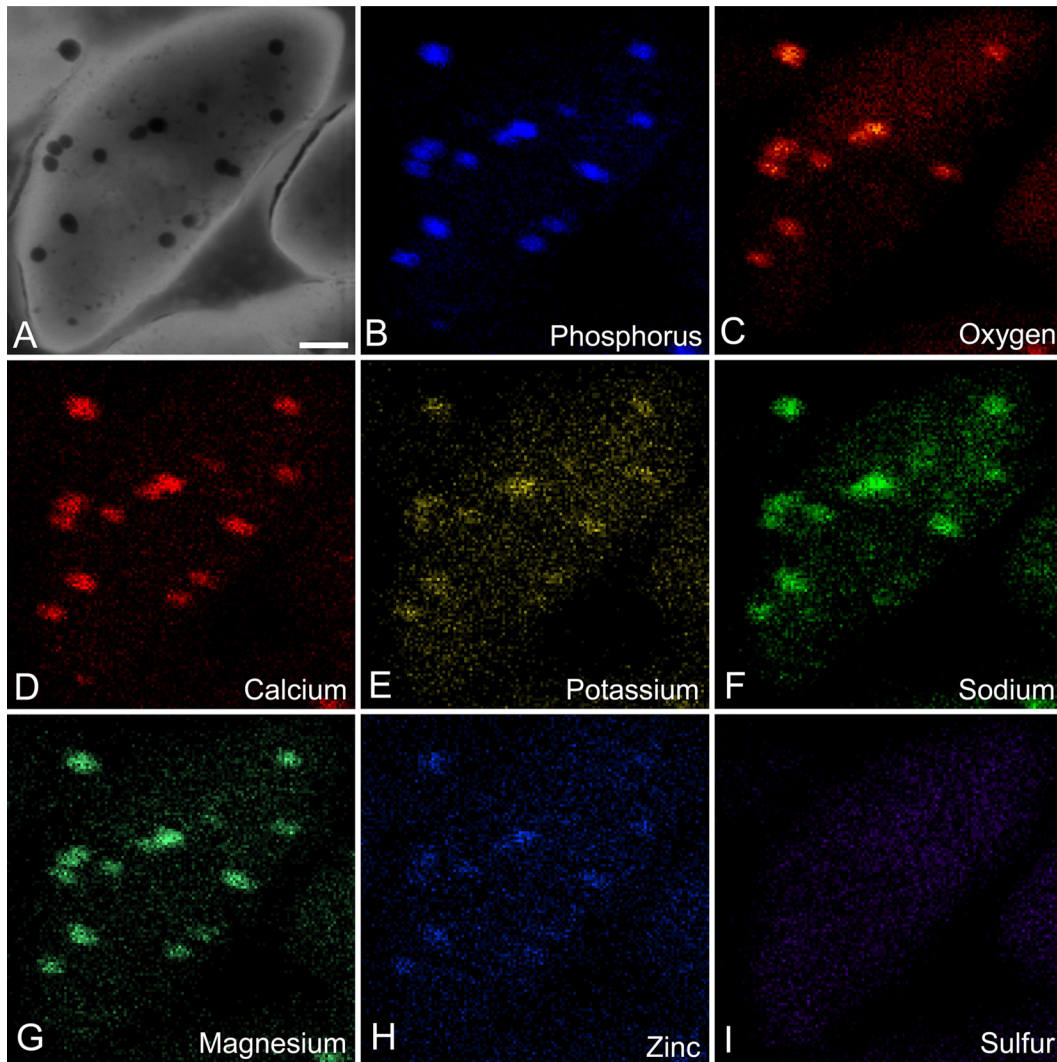

**Figure S1. Visualization of acidocalcisomes and spatial mapping of elemental distribution by whole-cell electron microscopy.**

Acidocalcisomes are clearly identified as round, electron dense structures seen throughout the cell in A. B-I, specific elements are mapped from the cells identified in A. Scale bar = 0.5  $\mu\text{m}$ .
